# Supplementary material
Source: Springer Nature journal article supplement (https://www.springermedizin.de/resource/supplementary/12943_2010_604_MOESM5_ESM.pdf/9555090)

**A****LNCaP in CS-FBS**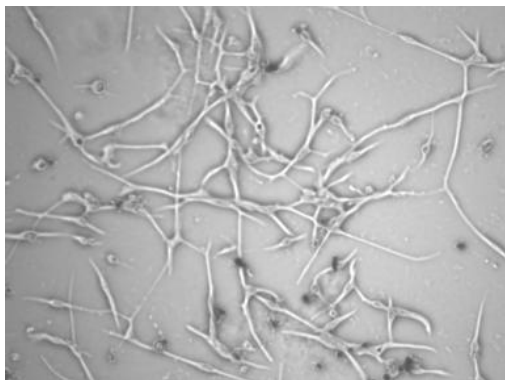**EtOH, 60 Days**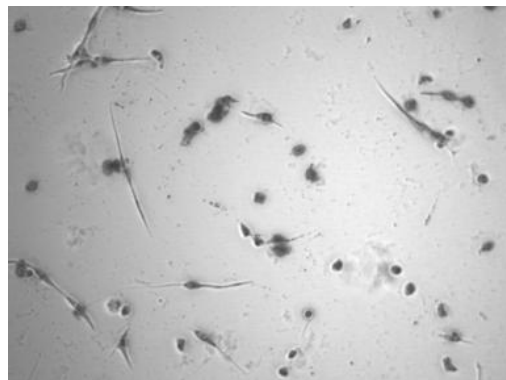**Cyclo, 60 Days****B****LNCaP-AI in CS-FBS**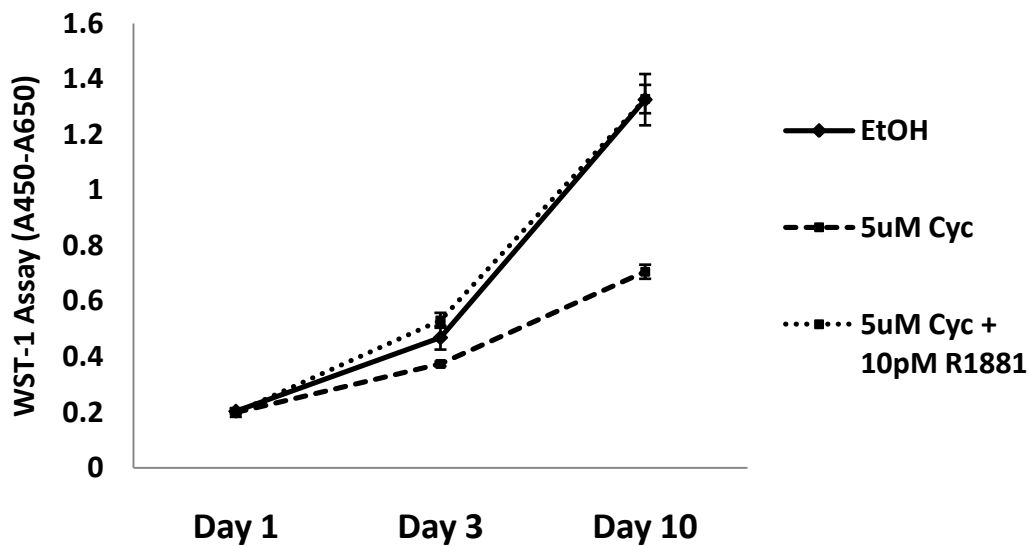

Supplement: MOESM5 [file 9555090]
